# Supplementary material for: Determination of sub-ng g−1 Au in geological samples by ion molecule reaction ICP-MS and CH4 plasma modifier
Source: Royal Society of Chemistry journal article supplement (doi:10.1039/c5ra19692b), 2015-01-01
Supplement: c5ra19692b1.pdf [file c5ra19692b1.pdf]

## Determination of sub-ng g<sup>-1</sup> Au in geological samples by ion molecule reaction ICP-MS and CH<sub>4</sub> plasma modifier

Wei Guo\*, Wenke Xie, Lanlan Jin, Qinghai Guo, and Shenghong Hu\*

State Key Laboratory of Biogeology and Environmental Geology, China University of Geosciences, Wuhan, 430074, P. R. China

\*Corresponding Author. Tel and Fax: +86-27-67883495

Email address: [guowei012345@163.com](mailto:guowei012345@163.com) (Wei Guo); [shhu@cug.edu.cn](mailto:shhu@cug.edu.cn) (Shenghong Hu).

### Electronic Supplementary Information

1. Fig S1 Diagram of the experimental setup.

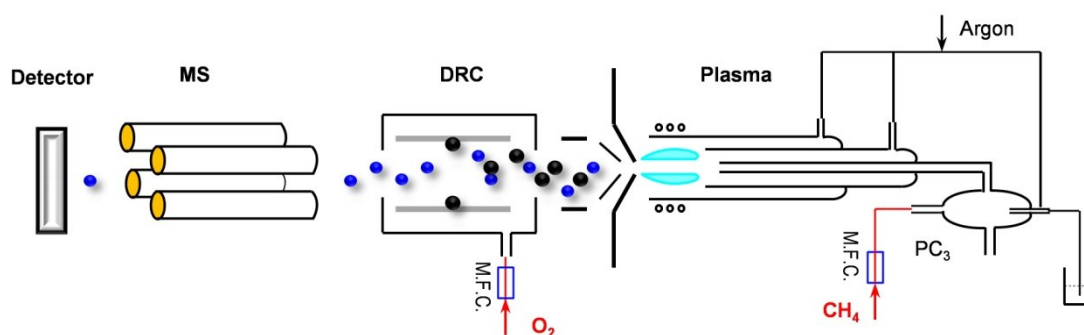

Fig S1 Diagram of the experimental setup.

2. **Table S1** Closed acid digestion procedure with a mixture of HCL + HF + HNO<sub>3</sub>.

**Table S1.** Closed acid digestion procedure with a mixture of HCL + HF + HNO<sub>3</sub>

| Step | Description                                                                                                                                                                   |
|------|-------------------------------------------------------------------------------------------------------------------------------------------------------------------------------|
| 1    | 100 mg sample powder (< 200 mesh) was weighed into a Teflon bomb, moistened with a few drops of ultrapure water.                                                              |
| 2    | 1.0 mL HNO <sub>3</sub> +1.0 ml HF +1.0 ml HCL were added. The sealed bomb was heated at 190 °C in oven for > 48 h.                                                           |
| 3    | Open the bomb and evaporate the solution at ~120 °C to dryness. This was followed by adding 1 ml HNO <sub>3</sub> +1.0 ml HCL and evaporating to the second round of dryness. |
| 4    | The resultant salt was re-dissolved by adding ~1 ml of HNO <sub>3</sub> +1.0 ml HCL and resealed and heated in the bomb at 190 °C for >12 h.                                  |
| 5    | The final solution was diluted to ~20 g with pure water for ICP-MS analysis.                                                                                                  |
